# Supplementary material for: Artificial Diels–Alderase based on the transmembrane protein FhuA
Source: publisher site journal article supplement (doi:10.3762/bjoc.12.124), 2016-06-24
Supplement: Additional file 1 [file 1860-5397-12-124-S1.pdf]

# Supporting Information

for

## Artificial Diels–Alderase based on the transmembrane protein FhuA

Hassan Osseili<sup>‡,1</sup>, Daniel F. Sauer<sup>‡,1</sup>, Klaus Beckerle<sup>1</sup>, Marcus Arlt<sup>2</sup>, Tomoki Himiyama<sup>3</sup>, Tino Polen<sup>4</sup>, Akira Onoda<sup>3</sup>, Ulrich Schwaneberg<sup>2</sup>, Takashi Hayashi<sup>3</sup> and Jun Okuda<sup>\*,1</sup>

Address: <sup>1</sup>Institute of Inorganic Chemistry, RWTH Aachen University, Landoltweg 1, 52056 Aachen, Germany, <sup>2</sup>Institute of Biotechnology, RWTH Aachen University, Worringer Weg 1, 52056 Aachen, Germany, <sup>3</sup>Department of Applied Chemistry, Graduate School of Engineering, Osaka University, 2-1 Yamadaoka, Suita 565-0871, Japan and <sup>4</sup>Institute of Bio- and Geosciences IBG-1: Biotechnology, Forschungszentrum Jülich GmbH, 52425 Jülich, Germany.

Email: Jun Okuda - jun.okuda@ac.rwth-aachen.de

\*Corresponding author

<sup>‡</sup>Equal contributors

**Illustration of the catalyst 2 and NMR spectra of synthesized  
compounds**

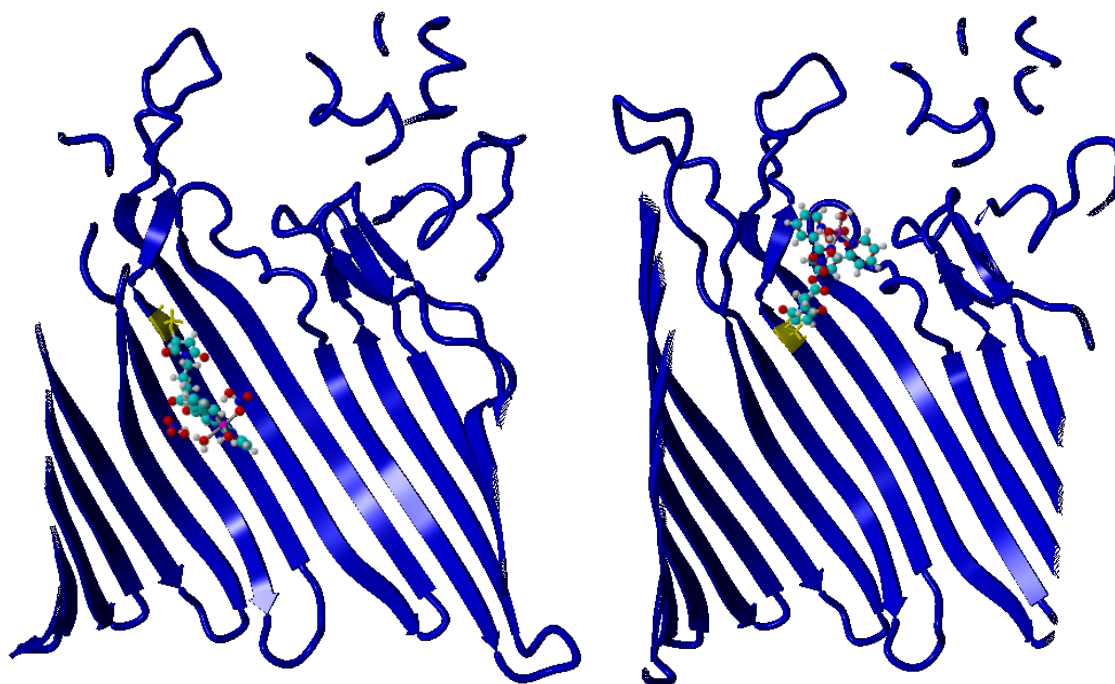

**Figure S1:** Illustration of the catalyst **2** within the cavity of FhuA.

## NMR spectra of synthesized compounds

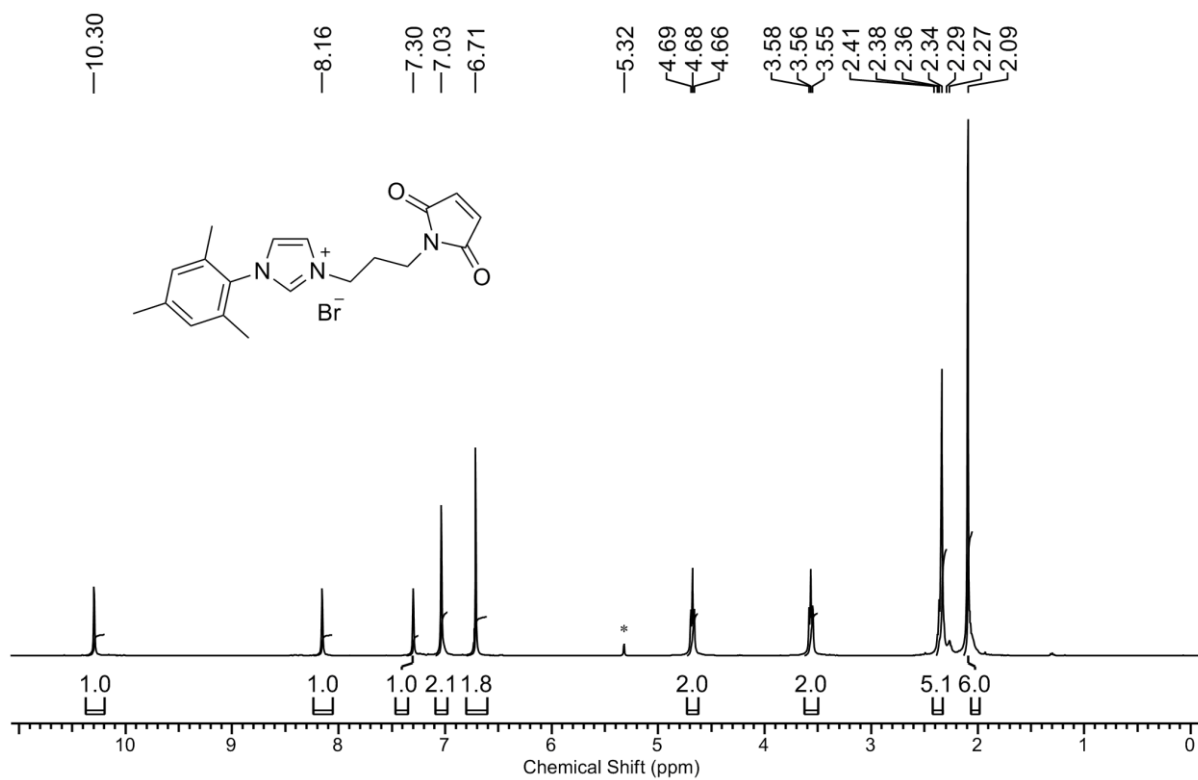

**Figure S2.**  $^1\text{H}$  NMR spectrum (23 °C,  $^*\text{CD}_2\text{Cl}_2$ ) of compound **3**.

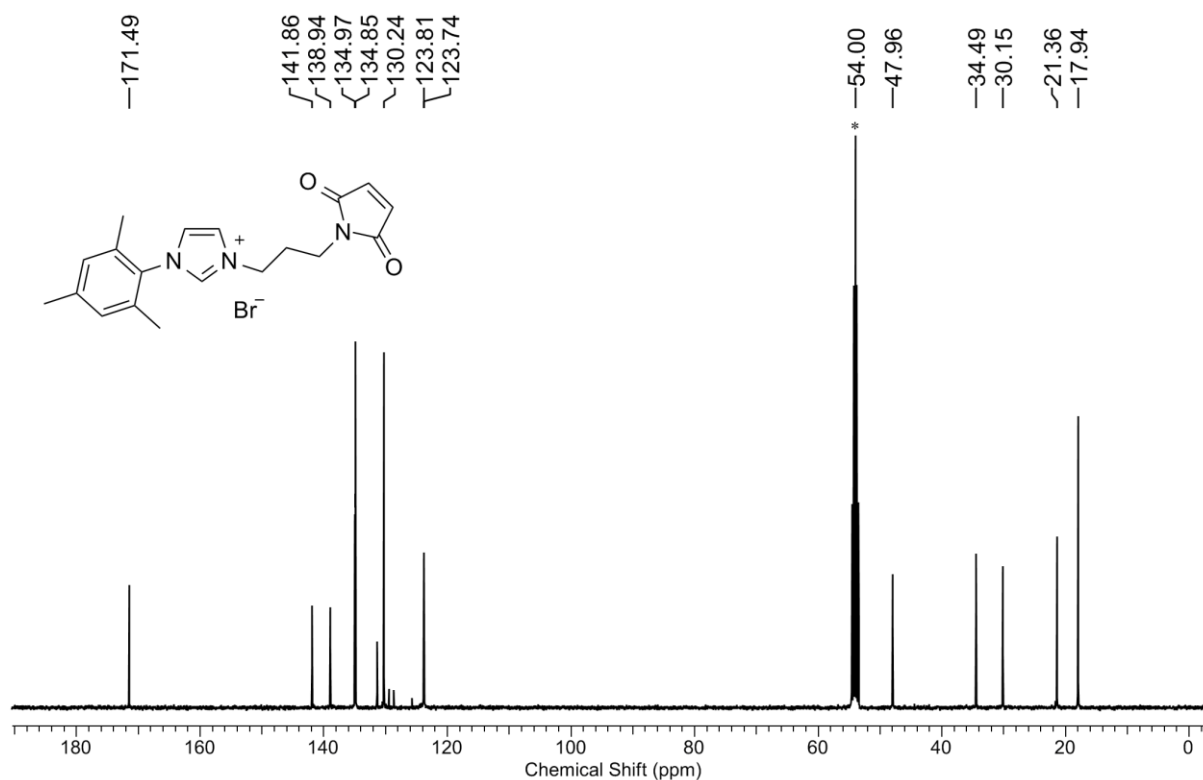

**Figure S3.**  $^{13}\text{C}$  NMR spectrum (23 °C,  $^*\text{CD}_2\text{Cl}_2$ ) of compound 3.

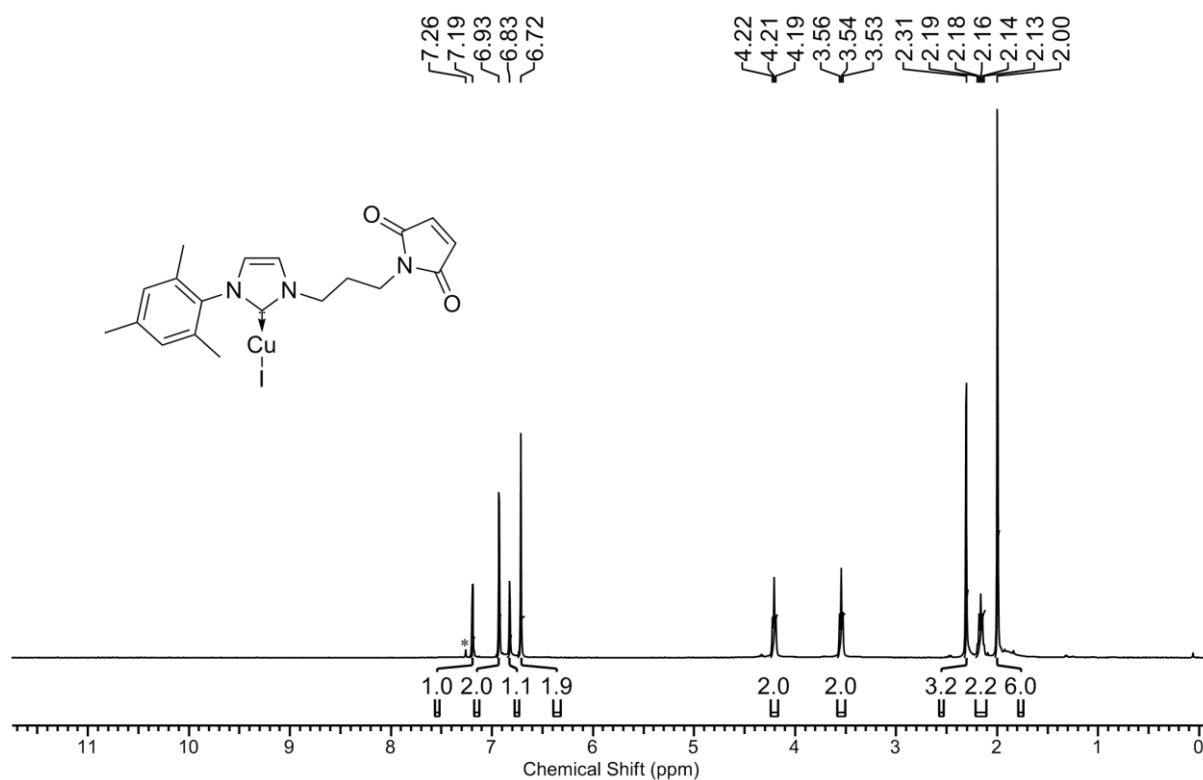

**Figure S4.**  $^1\text{H}$  NMR spectrum (23 °C,  $^*\text{CDCl}_3$ ) of compound 4.

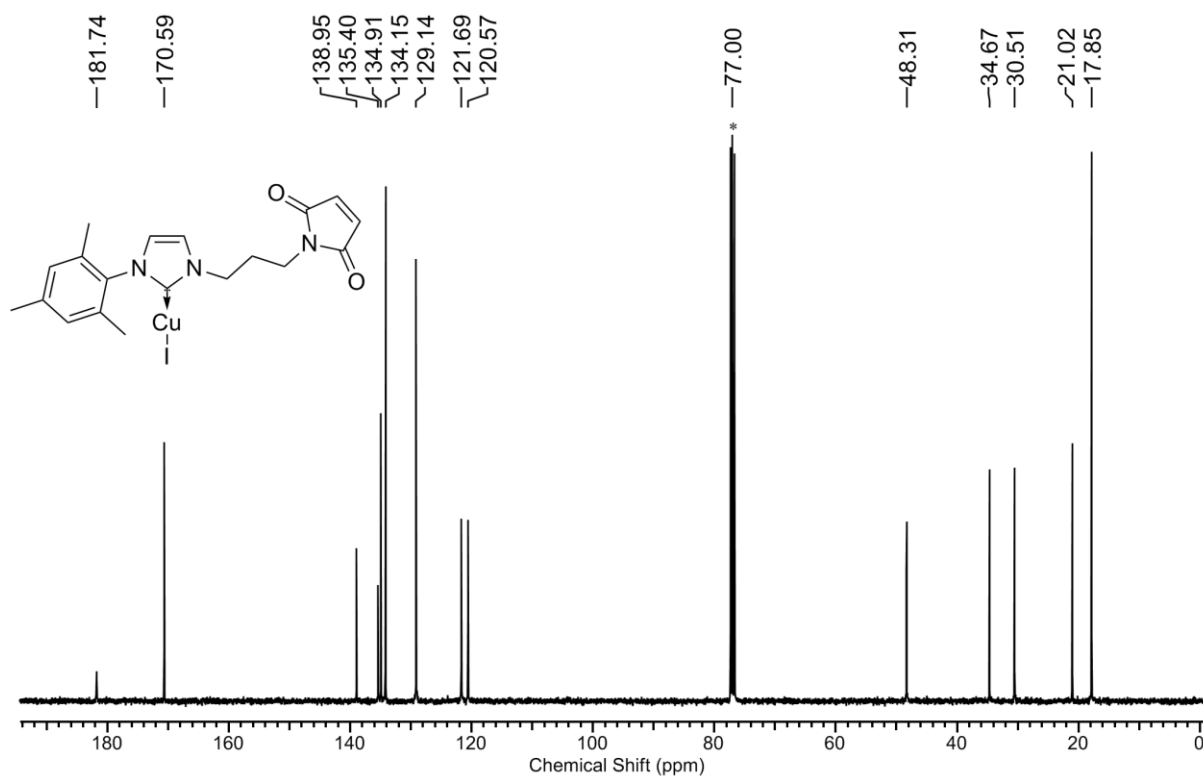

**Figure S5.** <sup>13</sup>C NMR spectrum (23 °C, \*CDCl<sub>3</sub>) of compound 4.

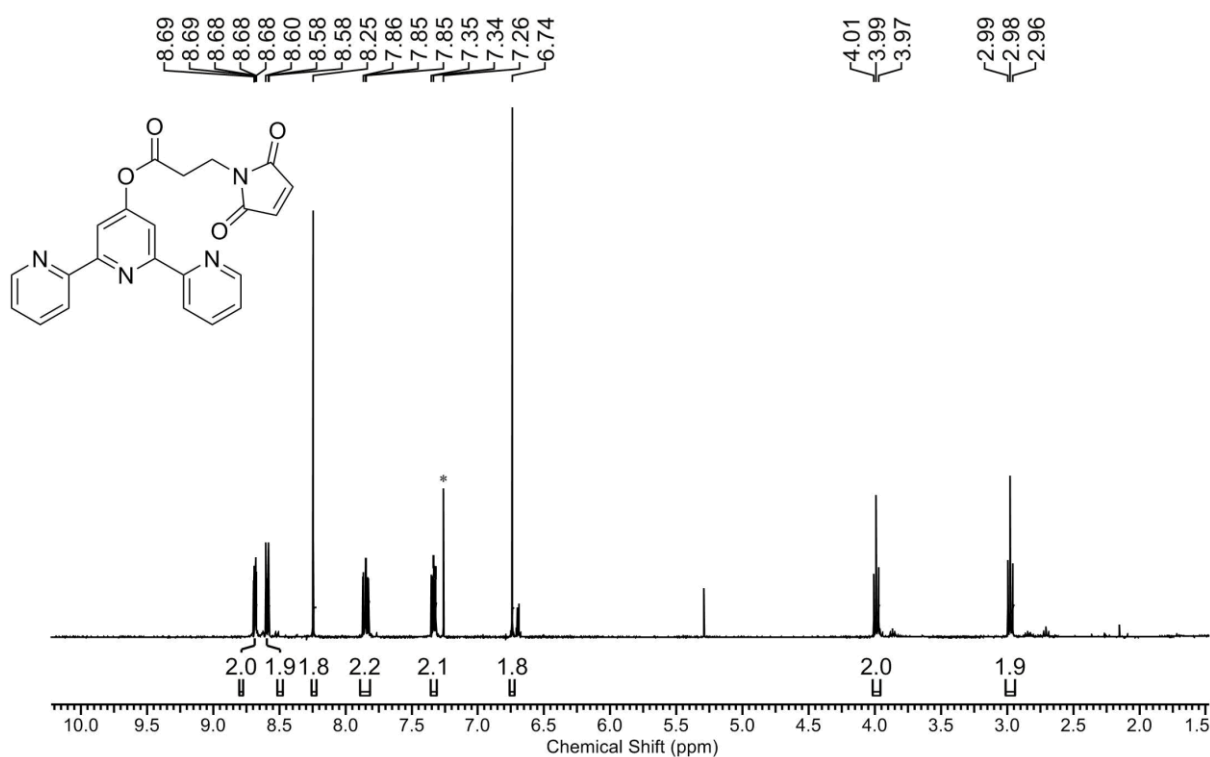

**Figure S6.** <sup>1</sup>H NMR spectrum (23 °C, \*CDCl<sub>3</sub>) of compound 8.

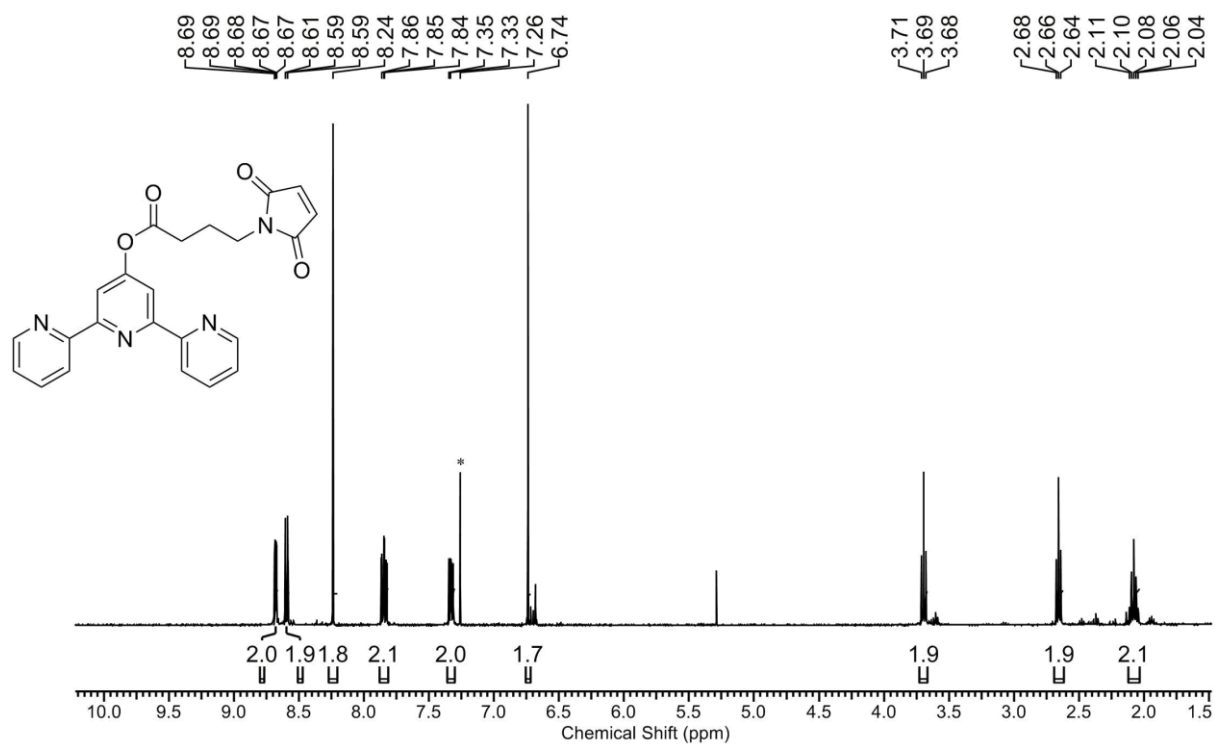

**Figure S7.** <sup>1</sup>H NMR spectrum (23 °C, \*CDCl<sub>3</sub>) of compound **9**.
